# Supplementary material
Source: PubMed Central journal article supplement (PMC8898271)
Supplement: NIHMS1756108-supplement-2.pdf [file NIHMS1756108-supplement-2.pdf]

**A**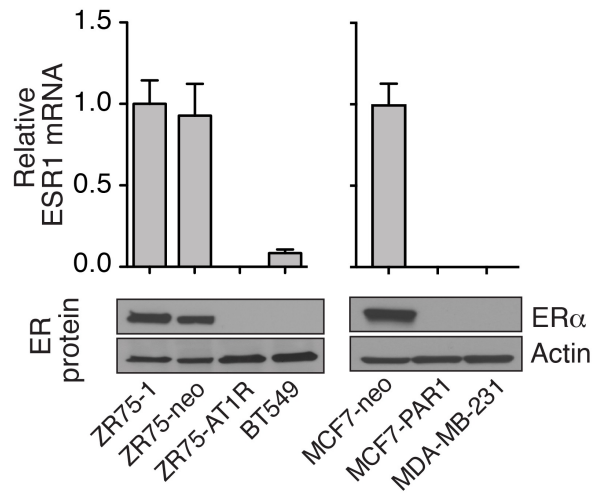**B**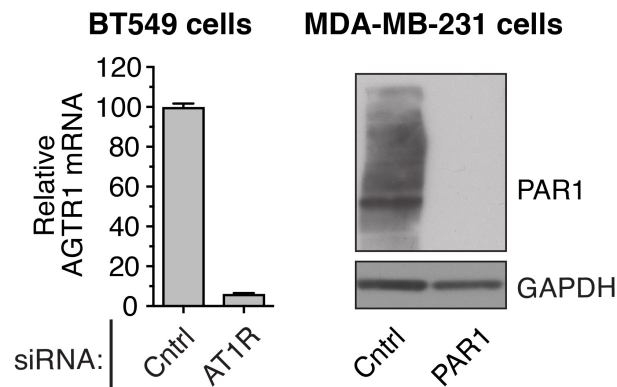

**Supplementary Fig. S1. AT1R and PAR1 overexpression and knockdown in breast cancer lines.** **A**, Effect of stable AT1R or PAR1 expression on ER expression at both the protein and mRNA level. **B**, The magnitude of AT1R knockdown in BT549 cells was assessed by quantitative RT-PCR due to the lack of commercially available specific antibodies to the AT1R protein. PAR1 knockdown efficacy was determined by western blotting. PAR1 protein appears as a smear in western blots due to multiple glycosylation-type modifications.

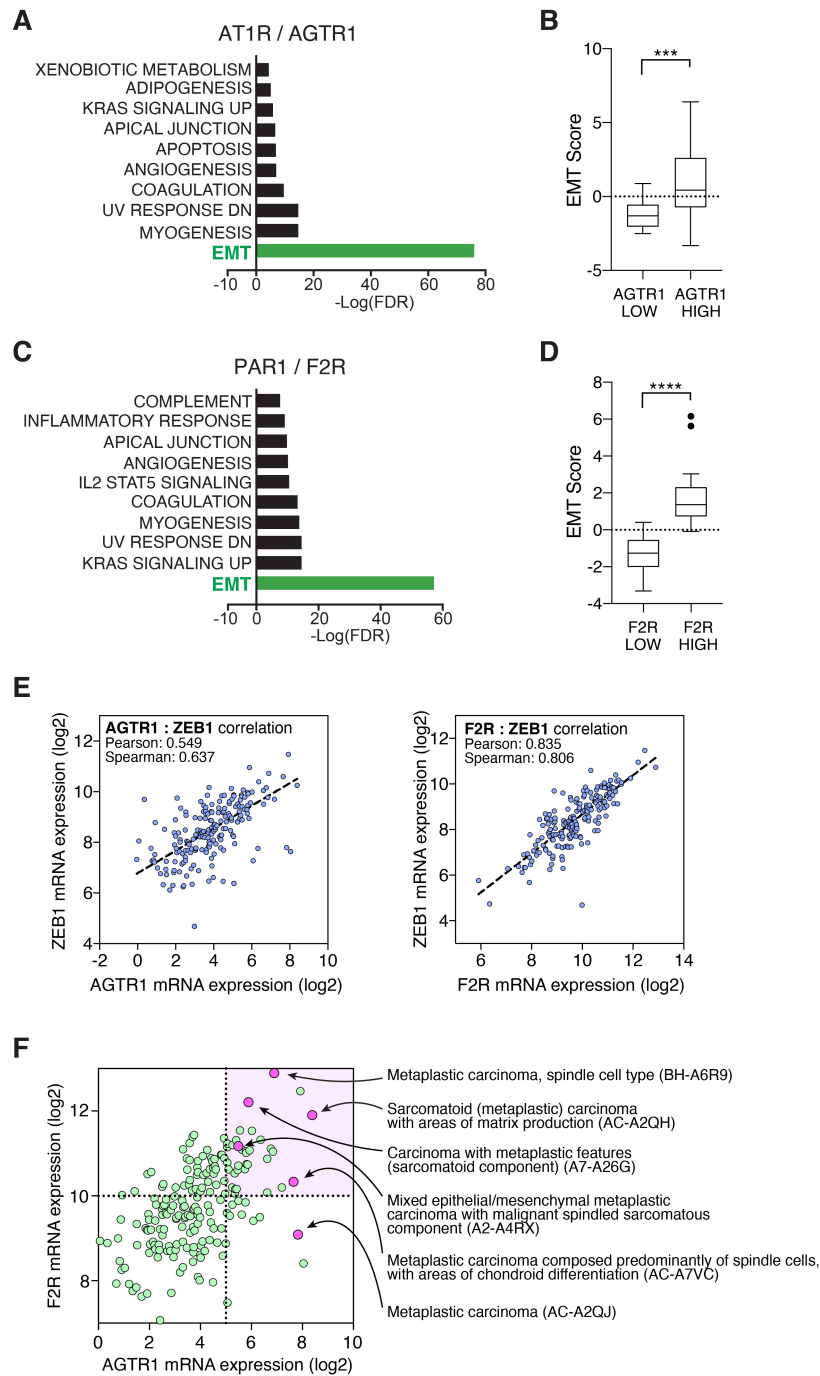

**Supplementary Fig. S2. *AGTR1* and *F2R* gene expression are strongly associated with EMT in TNBC.** **A**, Pathways associated with *AGTR1* expression in TNBCs within the TCGA cohort, ranked by false discovery rate (FDR). **B**, EMT scores, calculated by the method of Mak et al (reference 24 in main text) for the same set of high/low *AGTR1* expressing cases evaluated in panel A. \*\*\*,  $P < 0.001$ ; Mann-Whitney U test. **C** and **D**, Pathways and EMT scores associated with *F2R* expression in the same TNBC cases from the TCGA. \*\*\*\*,  $P < 0.001$ ; Mann-Whitney U test. **E**, Associations between either *AGTR1* or *F2R* and *ZEB1* within TNBC cases included in the TCGA. **F**, Relationship between *AGTR1* and *F2R* expression in TNBC cases included in the TCGA. Highlighted in pink are the six cases within the TCGA breast dataset that were diagnosed as metaplastic carcinoma with spindle cell/sarcomatoid differentiation. Metaplastic carcinomas showing only squamous differentiation are not highlighted. The upper right quadrant (light pink) illustrates cases with combined high *AGTR1* and *F2R* expression.

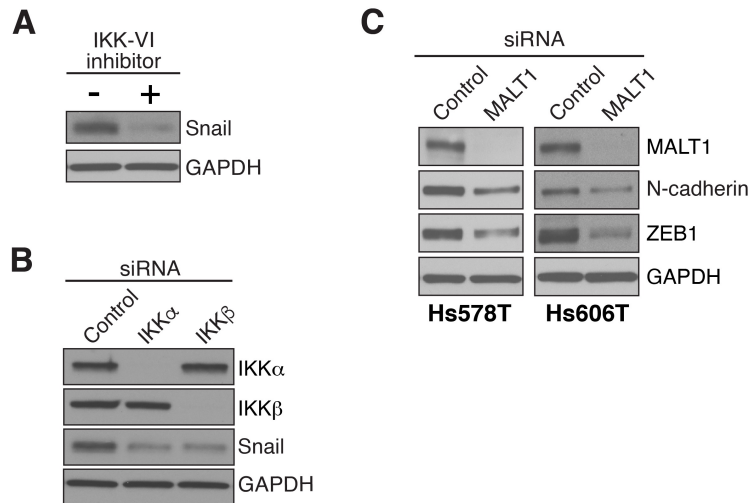

**Supplementary Fig. S3. Role of CBM-dependent NF- $\kappa$ B signaling in mediating EMT. A,** Effect of pharmacologic NF- $\kappa$ B inhibition using the IKK $\beta$  inhibitor, IKK-VI (5  $\mu$ M; 2 days), on Snail expression in BT549 cells. **B,** Effect of siRNA-mediated IKK $\alpha$  or IKK $\beta$  knockdown on Snail expression in BT549 cells. **C,** Effect of siRNA-mediated knockdown of MALT1 on N-cadherin and ZEB1 expression in Hs578T and Hs606T cells.

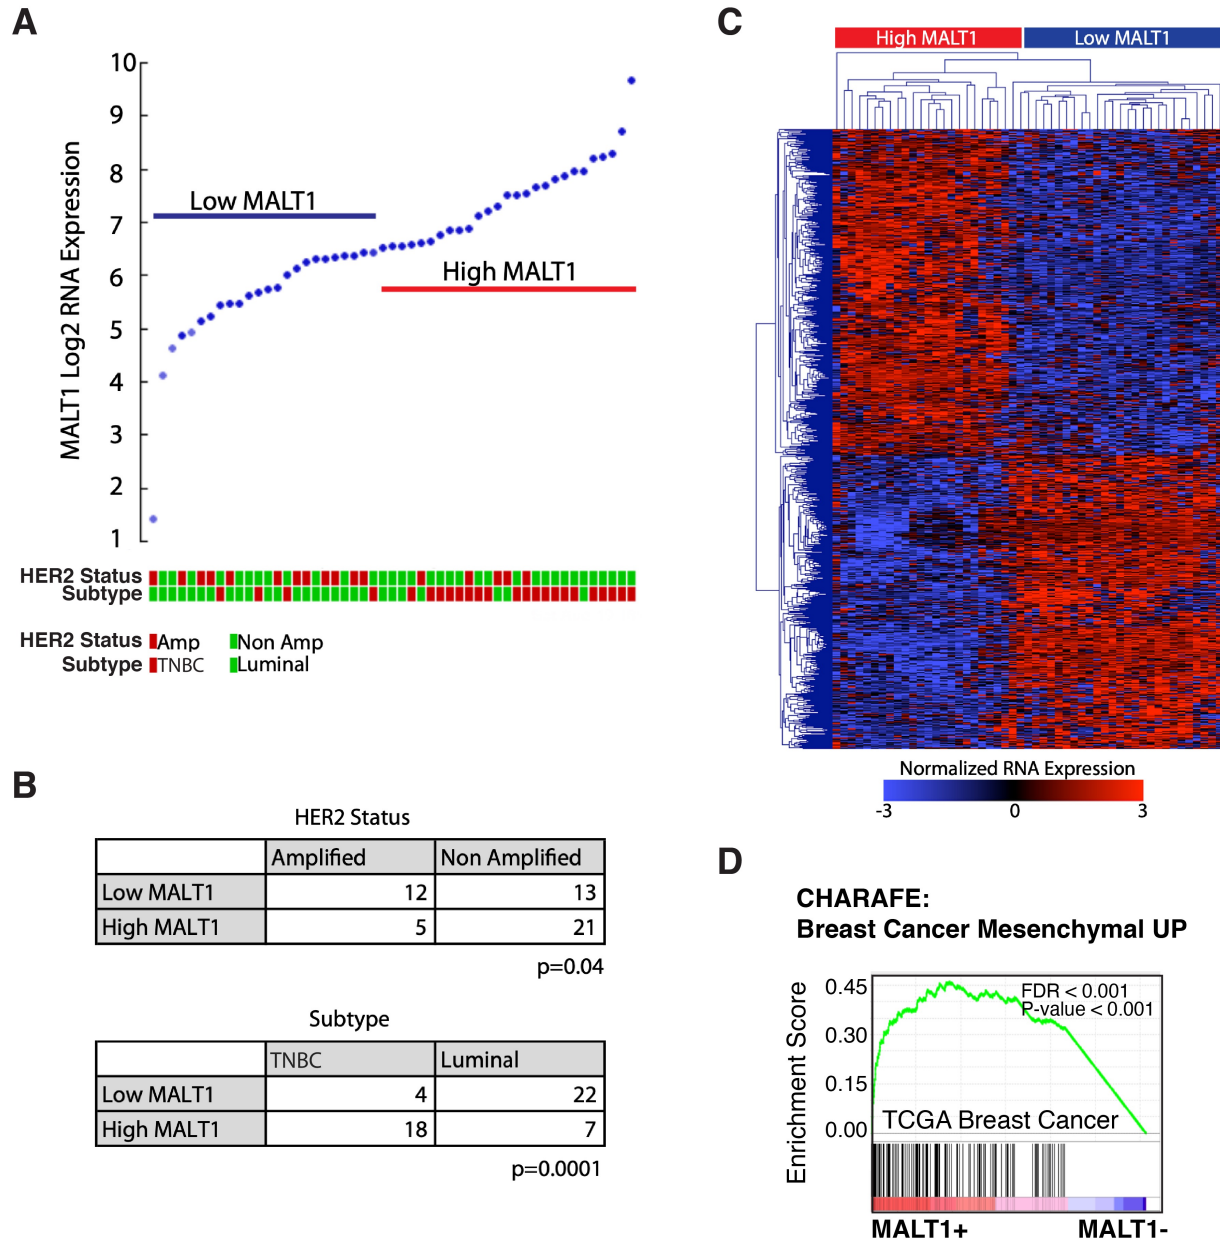

**Supplementary Fig. S4. MALT1 levels are associated with the TNBC subtype and EMT signature in breast cancer.** **A** and **B**, Breast cancer cell lines from the Hoeflich dataset, dichotomized for MALT1 gene expression, with their corresponding HER2 and molecular subtype status. **C**, Heatmap to display differentially expressed genes between high and low MALT1 expressing cell lines. Specific genes are listed in tabular form in Supplementary Table 1/2 (minimum fold change 2.0, Wilcoxon rank-sum test with adjusted *P* value using Benjamin and Hochberg correction). **D**, GSEA demonstrating an association between MALT1 expression and the Charafe mesenchymal UP signature in TCGA breast cancer cases.

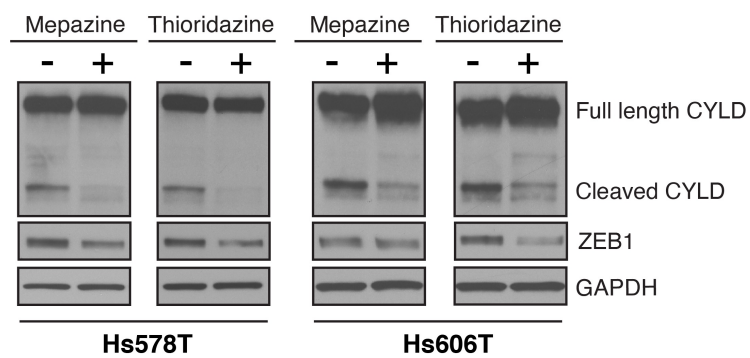

**Supplementary Fig. S5. Pharmacologic MALT1 inhibition reduces ZEB1 expression in multiple AT1R+ breast cancer lines.** Hs578T and Hs606T cells were treated with or without mepazine (10  $\mu$ M) or thioridazine (5  $\mu$ M) for 2 days prior to harvesting and immunoblot analysis.
